# Supplementary material for: Widespread Contamination of SARS-CoV-2 on Highly Touched Surfaces in Brazil During the Second Wave of the COVID-19 Pandemic
Source: bioRxiv or medRxiv preprint supplement (doi:10.1101/2021.06.14.21258894), 2021-06-21
Supplement: Supplementary file [file media-1.pdf]

**Supplementary material for:**

**Widespread Contamination of SARS-CoV-2 on Highly Touched Surfaces in  
in Brazil During the Second Wave of the COVID-19 Pandemic**

Severino Jefferson Ribeiro da Silva<sup>1</sup>, Jéssica Catarine Frutuoso do Nascimento<sup>1</sup>, Wendell Palôma Maria dos Santos Reis<sup>1</sup>, Caroline Targino Alves da Silva<sup>1</sup>, Poliana Gomes da Silva<sup>1</sup>, Renata Pessôa Germano Mendes<sup>1</sup>, Allyson Andrade Mendonça<sup>1</sup>, Bárbara Nazly Rodrigues Santos<sup>1</sup>, Jurandy Júnior Ferraz de Magalhães<sup>1,2,3</sup>, Alain Kohl<sup>4</sup> and Lindomar Pena<sup>1\*</sup>

<sup>1</sup>Department of Virology, Aggeu Magalhães Institute (IAM), Oswaldo Cruz Foundation (Fiocruz), 50670-420, Recife, Pernambuco, Brazil;

<sup>2</sup>Department of Virology, Pernambuco State Central Laboratory (LACEN/PE), Recife, Pernambuco, Brazil;

<sup>3</sup>University of Pernambuco (UPE), Serra Talhada Campus, Serra Talhada, Pernambuco, Brazil;

<sup>4</sup>MRC-University of Glasgow, Centre for Virus Research, Glasgow, G61 1QH, UK;

\*Corresponding author: [lindomar.pena@fiocuz.br](mailto:lindomar.pena@fiocuz.br)

**Figure S1.** Standard curve using N1 and N2 primers to detect SARS-CoV-2 RNA extracted from cell supernatants.

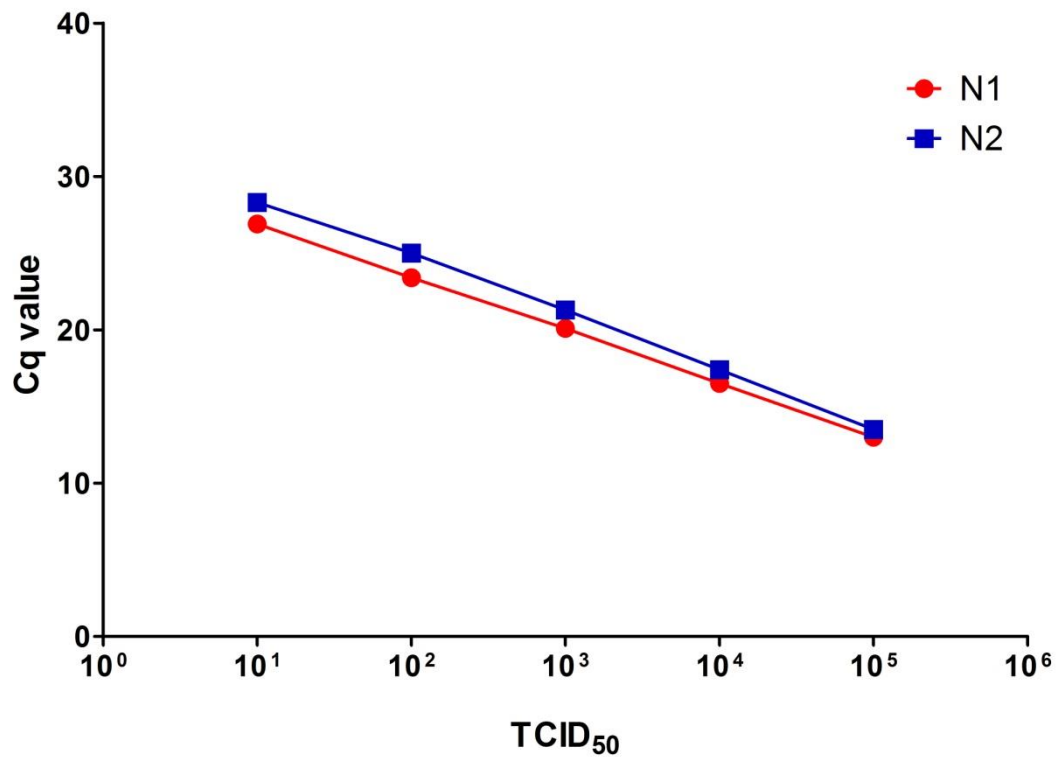

TCID<sub>50</sub>: 50% Tissue Culture Infectious Dose

Cq: Cycle quantification

**Figure S2.** Attempted to SARS-CoV-2 isolation using the Vero CCL-81 cell lineage.

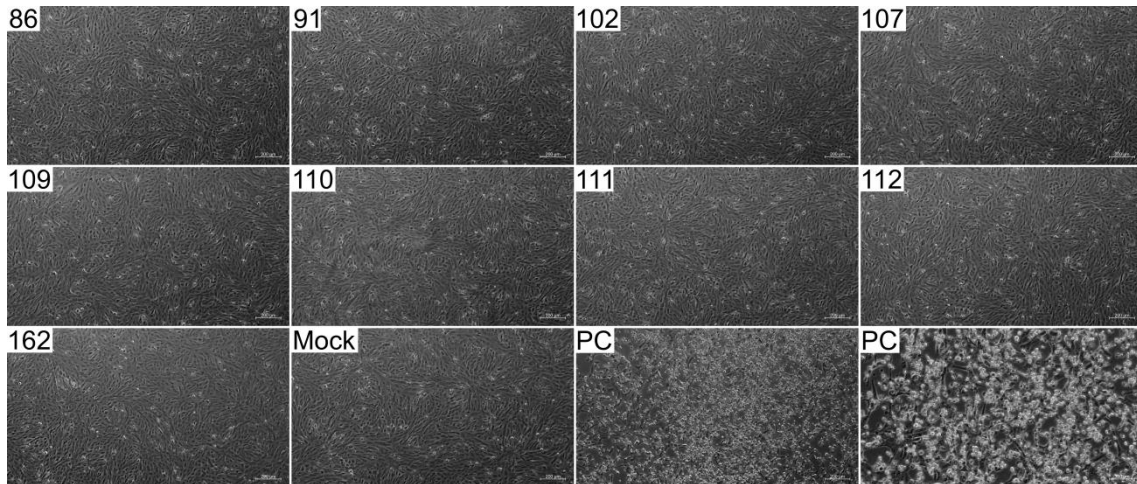

**Cytopathic effect observed in positive surface samples.** Specimens with a lower C<sub>q</sub> value (86, 91, 102, 107, 109, 110, 111, 112 and 162) among samples tested positive for SARS-CoV-2 after three passages. Mock: uninfected cells; PC: positive control (SARS-CoV-2 isolated from patient sample).

**Table S1.** Primers used in this study for SARS-CoV-2 detection.

| <b>Target</b> | <b>Primer name</b> | <b>Oligonucleotide Sequence (5'-3')<sup>a</sup></b> | <b>Assay</b> |
|---------------|--------------------|-----------------------------------------------------|--------------|
| N             | 2019-nCoV_N1-F     | GACCCCAAATCAGCGAAAT                                 | RT-qPCR      |
|               | 2019-nCoV_N1-R     | TCTGGTTACTGCCAGTTGAATCTG                            | RT-qPCR      |
|               | 2019-nCoV_N1-P     | FAM-ACCCCGCATTACGTTTGGTGGACC-BHQ1                   | RT-qPCR      |
|               | 2019-nCoV_N2-F     | TTACAAACATTGGCCGCAA                                 | RT-qPCR      |
|               | 2019-nCoV_N2-R     | GCGCGACATTCCGAAGAA                                  | RT-qPCR      |
|               | 2019-nCoV_N2-P     | FAM-ACAATTTGCCCCAGCGCTTCAG-BHQ1                     | RT-qPCR      |
|               |                    |                                                     |              |

<sup>a</sup> Primers were designed by CDC-USA.

**Table S2. Positivity of SARS-CoV-2 RNA on public touched surfaces at different locations in Recife, Pernambuco state, Brazil.**

| <b>Location</b>     | <b>Site</b> | <b>Number of samples collected</b> | <b>Number os positive surfaces (%)</b> |
|---------------------|-------------|------------------------------------|----------------------------------------|
| Transport terminals | 01          | 21                                 | 20 (95.2%)                             |
|                     | 02          | 21                                 | 16 (76.1%)                             |
|                     | 03          | 21                                 | 8 (38.0%)                              |
|                     | 04          | 21                                 | 3 (14.2%)                              |
| Health care units   | 05          | 21                                 | 4 (19.0%)                              |
|                     | 06          | 21                                 | 3 (14.2%)                              |
|                     | 07          | 21                                 | 18 (85.7%)                             |
|                     | 08          | 21                                 | 1 (4.76%)                              |
| Public parks        | 09          | 21                                 | 3 (14.2%)                              |
|                     | 10          | 21                                 | 4 (19.0%)                              |
|                     | 11          | 21                                 | 3 (14.2%)                              |
|                     | 12          | 21                                 | 2 (9.52%)                              |
|                     | 13          | 21                                 | 2 (9.52%)                              |
| Public markets      | 14          | 21                                 | 2 (9.52%)                              |
|                     | 15          | 21                                 | 0 (0%)                                 |
|                     | 16          | 21                                 | 1 (4.76%)                              |
|                     | 17          | 22                                 | 1 (4.54%)                              |
| Beach places        | 18          | 21                                 | 4 (19.0%)                              |
| Other places        | 19          | 21                                 | 2 (9.52%)                              |

**Table S2.** Positive samples for SARS-CoV-2 RNA on public touched surfaces at different locations in Recife, Pernambuco state, Brazil.

| Location          | Sample ID* | Surface                  | Specific location    | Type of material | Cq value (N1) |
|-------------------|------------|--------------------------|----------------------|------------------|---------------|
| Health care units | 01         | Standing rest bar        | Ambulatory entrance  | Metal            | 37.8          |
|                   | 08         | Handle                   | Hospital access      | Metal            | 36.2          |
|                   | 13         | Doorbell                 | Hospital access      | Plastic          | 36.4          |
|                   | 14         | Iron grades              | Principal entrance   | Metal            | 38.2          |
|                   | 24         | Bench                    | Principal entrance   | Wood             | 37.3          |
|                   | 36         | Bench                    | Hospital access      | Wood             | 36.3          |
|                   | 39         | Light switch             | Toilet               | Plastic          | 36.3          |
|                   | 43         | Wall                     | Hospital access      | Rock             | 35.6          |
|                   | 44         | Wall                     | Hospital access      | Rock             | 35.5          |
|                   | 45         | Handrail                 | Hospital access      | Metal            | 37.4          |
|                   | 46         | Handrail                 | Hospital access      | Metal            | 36.6          |
|                   | 47         | Handrail                 | Hospital access      | Metal            | 34.8          |
|                   | 48         | Handrail                 | Hospital access      | Metal            | 36.0          |
|                   | 49         | Wall                     | Hospital access      | Rock             | 36.2          |
|                   | 51         | Phone                    | Public phone         | Plastic          | 38.1          |
|                   | 52         | Handrail                 | Hospital access      | Rock             | 34.8          |
|                   | 53         | Traffic light button     | Traffic light button | Plastic          | 34.8          |
|                   | 54         | Traffic light button     | Traffic light button | Plastic          | 35.2          |
|                   | 55         | Traffic light pole       | Traffic light button | Metal            | 35.3          |
|                   | 57         | Traffic light button box | Traffic light button | Metal            | 36.6          |
| 59                | Park bench | Bus stop                 | Concrete             | 34.4             |               |

|                            |     |                    |                     |                 |      |
|----------------------------|-----|--------------------|---------------------|-----------------|------|
|                            | 60  | Bus stop bench     | Bus stop            | Metal           | 36.7 |
|                            | 61  | Bus stop ceiling   | Bus stop            | Plastic         | 35.0 |
|                            | 62  | Trash box          | Bus stop            | Plastic         | 35.0 |
|                            | 63  | Road sign pole     | Resting area        | Metal           | 35.8 |
|                            | 67  | Handrail           | Resting area        | Metal           | 37.5 |
| <b>Transport terminals</b> | 85  | Faucet             | Toilet              | Plastic         | 34.7 |
|                            | 86  | Wall               | Toilet              | Rock            | 33.6 |
|                            | 87  | Bench              | Bench               | Wood            | 37.6 |
|                            | 88  | Handrail           | Handrail            | Metal           | 36.8 |
|                            | 89  | Toilet seat        | Toilet              | Other (Ceramic) | 35.4 |
|                            | 90  | Column             | Bus terminal access | Concrete        | 35.9 |
|                            | 91  | Faucet             | Faucet              | Metal           | 32.2 |
|                            | 92  | Bench              | Bench               | Wood            | 35.2 |
|                            | 93  | Handrail           | Handrail            | Metal           | 34.1 |
|                            | 94  | Faucet             | Toilet              | Plastic         | 34.1 |
|                            | 95  | Handrail           | Handrail            | Metal           | 36.7 |
|                            | 97  | Bench              | Bench               | Plastic         | 34.9 |
|                            | 98  | Handrail           | Handrail            | Metal           | 35.9 |
|                            | 99  | ATM button         | ATM                 | Metal           | 36.0 |
|                            | 100 | Biometrics sensors | ATM                 | Plastic         | 34.4 |
|                            | 101 | Box                | ATM                 | Plastic         | 35.4 |
|                            | 102 | Button             | ATM                 | Metal           | 33.3 |
|                            | 103 | Biometrics sensors | ATM                 | Plastic         | 35.0 |
|                            | 104 | Walls              | Bus stop            | Metal           | 35.4 |
|                            | 105 | Protection grid    | Bus stop            | Metal           | 36.0 |
|                            | 106 | Button             | Ticket machine      | Other (Rubber)  | 37.6 |
|                            | 107 | Screen             | Ticket machine      | Glass           | 33.6 |
|                            | 108 | Handrail           | Handrail            | Metal           | 34.1 |

|                     |     |                    |                       |          |      |
|---------------------|-----|--------------------|-----------------------|----------|------|
|                     | 109 | Wall               | Toilet                | Rock     | 33.6 |
|                     | 110 | Bench              | Bench                 | Concrete | 33.7 |
|                     | 111 | Roulette           | Bus terminal exit     | Metal    | 33.7 |
|                     | 112 | Column             | Bus terminal access   | Concrete | 33.7 |
|                     | 113 | Wall               | Subway station access | Rock     | 36.5 |
|                     | 114 | Handrail           | Handrail              | Metal    | 35.4 |
|                     | 116 | Biometrics sensors | ATM                   | Plastic  | 36.2 |
|                     | 117 | Faucet             | Faucet                | Metal    | 36.7 |
|                     | 120 | Handrail           | Handrail              | Metal    | 36.4 |
|                     | 122 | Column             | Bus terminal access   | Concrete | 36.7 |
|                     | 123 | Pipe               | Bus terminal access   | Metal    | 35.3 |
|                     | 124 | Protection grid    | Bus terminal access   | Metal    | 36.7 |
|                     | 125 | Counter            | Counter               | Rock     | 37.6 |
|                     | 127 | Biometrics sensors | ATM                   | Plastic  | 36.4 |
|                     | 133 | Bench              | Bench                 | Wood     | 37.3 |
|                     | 134 | Grid               | Subway station access | Metal    | 35.4 |
|                     | 138 | Protection grid    | Bus terminal access   | Metal    | 38.7 |
|                     | 139 | Column             | Bus terminal access   | Concrete | 36.4 |
|                     | 141 | Handrail           | Handrail              | Metal    | 36.3 |
|                     | 143 | Screen             | Ticket machine        | Glass    | 36.7 |
|                     | 144 | Bench              | Bench                 | Wood     | 34.6 |
|                     | 155 | Keyboard           | ATM                   | Metal    | 36.4 |
|                     | 156 | Biometrics sensors | ATM                   | Plastic  | 37.3 |
|                     | 162 | Handrail           | Handrail              | Metal    | 31.1 |
| <b>Public parks</b> | 193 | Toy                | Playground            | Wood     | 37.7 |
|                     | 197 | Floor              | Recreation area       | Concrete | 37.1 |
|                     | 205 | Faucet             | Toilet                | Metal    | 37.3 |
|                     | 217 | Handrail           | Outdoor gym           | Metal    | 37.3 |



|                       |     |            |                    |          |      |
|-----------------------|-----|------------|--------------------|----------|------|
|                       | 221 | Bench      | Playground         | Wood     | 37.8 |
|                       | 229 | Slide      | Playground         | Metal    | 37.3 |
|                       | 231 | Barbell    | Outdoor gym        | Metal    | 37.2 |
|                       | 237 | Swing      | Playground         | Metal    | 37.3 |
|                       | 242 | Wall       | Recreation area    | Concrete | 36.3 |
|                       | 249 | Tree trunk | Recreation area    | Wood     | 36.2 |
|                       | 281 | Bench      | Recreation area    | Wood     | 37.4 |
|                       | 288 | Handrail   | Handrail           | Metal    | 37.6 |
|                       | 305 | Faucet     | Toilet             | Plastic  | 39.7 |
|                       | 311 | Barbell    | Playground         | Metal    | 37.4 |
| <b>Public markets</b> | 319 | Faucet     | Toilet             | Metal    | 37.5 |
|                       | 320 | Door       | Toilet             | Wood     | 37.9 |
|                       | 360 | Handrail   | Principal entrance | Metal    | 36.9 |
|                       | 386 | Grade      | Toilet             | Metal    | 38.1 |
| <b>Beach places</b>   | 177 | Tap        | Toilet             | Metal    | 36.1 |
|                       | 180 | Handrail   | Resting area       | Wood     | 37.0 |
|                       | 181 | Wall       | Toilet             | Rock     | 37.4 |
|                       | 188 | Bench      | Bench              | Rock     | 37.9 |
| <b>Other places</b>   | 258 | Handrail   | Handrail           | Metal    | 38.0 |
|                       | 261 | Faucet     | Toilet             | Plastic  | 38.7 |

\* Samples were numbered 1 to 400. Numbers shown are the ID of the sample tested positive by RT-qPCR.

**Table S4.** Viability of SARS-CoV-2 positive surface samples using the Vero CCL-81 lineage.

| <b>ID sample</b> | <b>Material</b> | <b>Swab<br/>(Cq value)</b> | <b>P3 – 0h<br/>(Cq value)</b> | <b>P3 – 72h<br/>(Cq value)</b> | <b>Interpretation</b> |
|------------------|-----------------|----------------------------|-------------------------------|--------------------------------|-----------------------|
| 86               | Rock            | 33.6                       | ND                            | ND                             | Non-culturable        |
| 91               | Metal           | 32.2                       | ND                            | ND                             | Non-culturable        |
| 102              | Metal           | 33.2                       | ND                            | ND                             | Non-culturable        |
| 107              | Glass           | 33.6                       | ND                            | ND                             | Non-culturable        |
| 109              | Rock            | 33.6                       | ND                            | ND                             | Non-culturable        |
| 110              | Concrete        | 33.7                       | ND                            | ND                             | Non-culturable        |
| 111              | Metal           | 33.7                       | ND                            | ND                             | Non-culturable        |
| 112              | Concrete        | 33.7                       | ND                            | ND                             | Non-culturable        |
| 162              | Metal           | 31.0                       | ND                            | ND                             | Non-culturable        |

P3: Passage 3
